# Supplementary material for: Bivariate Correlation Analysis of the Chemometric Profiles of Chinese Wild Salvia miltiorrhiza Based on UPLC-Qqq-MS and Antioxidant Activities
Source: PubMed Central journal article supplement (PMC6017509; doi:10.3390/molecules23030538), 2018-02-28
Supplement: molecules-23-00538-s001.pdf [file molecules-23-00538-s001.pdf]

Article

# Bivariate Correlation Analysis of the Chemometric Profiles of Chinese Wild *Salvia miltiorrhiza* Based on UPLC-Qqq-MS and Antioxidant Activities

Xiaodan Zhang <sup>1,2,†</sup>, Yange Yu <sup>3,†</sup>, Yesheng Cen <sup>1</sup>, Dongfeng Yang <sup>1</sup>, Zhechen Qi <sup>1</sup>, Zhuoni Hou <sup>1</sup>, Shuanglai Han <sup>4</sup>, Zengxuan Cai <sup>5</sup> and Kuancheng Liu <sup>1,\*</sup>

<sup>1</sup> College of Life Science, Zhejiang Sci-Tech University, Hangzhou 310018, China; zxd\_211@aliyun.com (X.Z.); cenyesheng@iCloud.com (Y.C.); ydf807@sina.com (D.Y.); zqi@zstu.edu.cn (Z.Q.); houzhuoni@zstu.edu.cn (Z.H.)

<sup>2</sup> Institute of Soil and Water Conservation, Chinese Academy of Sciences & Ministry of Water Resources, Yangling 712100, China

<sup>3</sup> Industrial Crops Research Institute, Henan Academy of Agricultural Sciences, Zhengzhou 450002, China; yyg604208@163.com

<sup>4</sup> Department of Research and Development, Focused Photonics Inc., Hangzhou 310018, China; shuanglai\_han@fpi-inc.com

<sup>5</sup> Department of Physicochemical and Toxicology, Zhejiang Provincial Center for Disease Control and Prevention, Hangzhou 310018, China; caizx\_cdc@163.com

\* Correspondence: kchliu@126.com; Tel.: +86-0571-8684-3192

† These authors contributed equally to this work.

Table S1. Chemical profiles of 50 wild *Salvia miltiorrhiza* varieties

| Sample<br>code | Investigated compounds           |       |       |       |       |       |      |      |       |      |       |       |       |                             |      |      |      |      |       |
|----------------|----------------------------------|-------|-------|-------|-------|-------|------|------|-------|------|-------|-------|-------|-----------------------------|------|------|------|------|-------|
|                | Twelve phenolic acids (mg/g, DW) |       |       |       |       |       |      |      |       |      |       |       |       | Five tanshinones (mg/g, DW) |      |      |      |      |       |
|                | 1                                | 2     | 3     | 4     | 5     | 6     | 7    | 8    | 9     | 10   | 11    | 12    | Total | 13                          | 14   | 15   | 16   | 17   | Total |
| S1             | 1.79                             | 0.017 | 0.047 | 0.064 | 0.003 | 0.009 | 5.43 | 3.31 | 39.04 | 0.28 | 0.029 | 0.093 | 50.12 | 1.40                        | 1.20 | 2.85 | 2.02 | 0.64 | 8.11  |
| S2             | 1.07                             | 0.013 | 0.016 | 0.150 | 0.003 | 0.004 | 7.63 | 3.55 | 40.49 | 0.12 | 0.028 | 0.062 | 53.13 | 0.53                        | 0.30 | 0.75 | 0.28 | 0.13 | 1.99  |
| S3             | 1.19                             | 0.009 | 0.014 | 0.071 | 0.002 | 0.001 | 5.41 | 2.08 | 39.05 | 0.14 | 0.035 | 0.047 | 48.05 | 1.28                        | 0.97 | 1.12 | 0.77 | 0.10 | 4.23  |
| S4             | 1.65                             | 0.020 | 0.038 | 0.077 | 0.003 | 0.019 | 5.78 | 3.62 | 42.36 | 0.30 | 0.041 | 0.131 | 54.04 | 1.77                        | 1.73 | 3.15 | 2.16 | 0.80 | 9.62  |
| S5             | 0.49                             | 0.011 | 0.027 | 0.039 | 0.002 | 0.014 | 2.02 | 1.50 | 25.13 | 0.17 | 0.032 | 0.012 | 29.45 | 3.52                        | 2.04 | 4.91 | 3.79 | 0.46 | 14.73 |
| S6             | 0.66                             | 0.004 | 0.004 | 0.046 | 0.001 | 0.004 | 5.50 | 3.06 | 38.51 | 0.13 | 0.029 | 0.031 | 47.98 | 1.77                        | 2.13 | 2.34 | 2.58 | 0.01 | 8.83  |
| S7             | 0.64                             | 0.002 | 0.002 | 0.066 | 0.001 | 0.002 | 5.13 | 3.79 | 36.11 | 0.10 | 0.032 | 0.048 | 45.94 | 0.82                        | 0.39 | 0.64 | 0.30 | 0.09 | 2.23  |
| S8             | 0.50                             | 0.003 | 0.012 | 0.114 | 0.001 | 0.013 | 8.66 | 2.11 | 45.76 | 0.09 | 0.028 | 0.000 | 57.30 | 0.32                        | 0.26 | 0.65 | 0.21 | 0.08 | 1.54  |
| S9             | 0.74                             | 0.007 | 0.009 | 0.110 | 0.003 | 0.003 | 7.06 | 3.26 | 39.16 | 0.11 | 0.028 | 0.049 | 50.53 | 0.17                        | 0.18 | 0.12 | 0.13 | 0.01 | 0.61  |
| S10            | 1.05                             | 0.004 | 0.004 | 0.055 | 0.002 | 0.001 | 8.20 | 4.15 | 40.93 | 0.13 | 0.027 | 0.094 | 54.64 | 0.16                        | 0.14 | 0.21 | 0.12 | 0.03 | 0.65  |
| S11            | 0.41                             | 0.015 | 0.024 | 0.034 | 0.002 | 0.004 | 1.19 | 1.10 | 22.57 | 0.08 | 0.036 | 0.008 | 25.48 | 4.13                        | 1.30 | 2.56 | 1.65 | 0.17 | 9.81  |
| S12            | 1.18                             | 0.009 | 0.019 | 0.031 | 0.001 | 0.005 | 6.62 | 3.00 | 44.66 | 0.12 | 0.027 | 0.014 | 55.69 | 1.48                        | 0.84 | 2.40 | 1.37 | 0.77 | 6.86  |
| S13            | 0.82                             | 0.015 | 0.024 | 0.043 | 0.003 | 0.006 | 5.48 | 3.18 | 42.25 | 0.20 | 0.029 | 0.023 | 52.08 | 7.49                        | 1.45 | 9.82 | 8.70 | 0.95 | 28.40 |
| S14            | 0.65                             | 0.002 | 0.003 | 0.039 | 0.002 | 0.005 | 5.99 | 3.01 | 37.85 | 0.12 | 0.028 | 0.030 | 47.72 | 0.10                        | 0.14 | 0.06 | 0.10 | 0.01 | 0.41  |

|     |      |       |       |       |       |       |       |      |       |      |       |       |       |      |      |      |      |      |       |
|-----|------|-------|-------|-------|-------|-------|-------|------|-------|------|-------|-------|-------|------|------|------|------|------|-------|
| S15 | 0.59 | 0.006 | 0.021 | 0.089 | 0.002 | 0.011 | 11.12 | 2.88 | 44.79 | 0.10 | 0.028 | 0.006 | 59.64 | 0.24 | 0.35 | 0.17 | 0.13 | 0.02 | 0.91  |
| S16 | 1.63 | 0.019 | 0.029 | 0.059 | 0.002 | 0.004 | 5.79  | 4.26 | 43.41 | 0.20 | 0.029 | 0.082 | 55.52 | 1.30 | 0.42 | 2.03 | 1.06 | 0.41 | 5.21  |
| S17 | 1.00 | 0.013 | 0.028 | 0.041 | 0.002 | 0.010 | 5.03  | 2.84 | 40.69 | 0.17 | 0.028 | 0.029 | 49.88 | 2.96 | 0.80 | 4.69 | 2.27 | 0.09 | 10.81 |
| S18 | 0.69 | 0.004 | 0.003 | 0.029 | 0.001 | 0.015 | 6.74  | 3.01 | 39.08 | 0.15 | 0.032 | 0.028 | 49.77 | 0.22 | 0.30 | 0.14 | 0.26 | 0.01 | 0.94  |
| S19 | 2.36 | 0.022 | 0.028 | 0.069 | 0.002 | 0.014 | 4.57  | 3.62 | 43.30 | 0.42 | 0.037 | 0.054 | 54.50 | 1.64 | 0.83 | 2.60 | 1.79 | 0.32 | 7.18  |
| S20 | 0.68 | 0.009 | 0.019 | 0.032 | 0.002 | 0.002 | 3.39  | 1.91 | 33.37 | 0.20 | 0.028 | 0.022 | 39.67 | 1.14 | 0.62 | 1.58 | 0.98 | 0.45 | 4.77  |
| S21 | 0.74 | 0.005 | 0.016 | 0.036 | 0.001 | 0.004 | 7.03  | 2.75 | 38.98 | 0.13 | 0.027 | 0.008 | 49.73 | 2.47 | 0.37 | 5.77 | 1.35 | 0.94 | 10.90 |
| S22 | 1.30 | 0.007 | 0.009 | 0.031 | 0.003 | 0.004 | 5.57  | 3.29 | 45.09 | 0.18 | 0.027 | 0.011 | 55.52 | 0.51 | 0.36 | 1.14 | 0.45 | 0.30 | 2.77  |
| S23 | 0.84 | 0.003 | 0.004 | 0.032 | 0.002 | 0.004 | 6.62  | 3.17 | 39.26 | 0.12 | 0.026 | 0.006 | 50.09 | 1.56 | 1.30 | 3.38 | 1.77 | 0.45 | 8.47  |
| S24 | 2.15 | 0.035 | 0.030 | 0.061 | 0.003 | 0.008 | 2.74  | 4.04 | 36.41 | 0.40 | 0.031 | 0.201 | 46.11 | 1.09 | 0.62 | 2.07 | 0.94 | 0.19 | 4.91  |
| S25 | 0.71 | 0.007 | 0.046 | 0.065 | 0.001 | 0.005 | 7.84  | 1.92 | 36.85 | 0.09 | 0.030 | 0.001 | 47.56 | 1.05 | 0.90 | 0.93 | 1.14 | 0.09 | 4.10  |
| S26 | 0.56 | 0.005 | 0.019 | 0.047 | 0.003 | 0.003 | 5.94  | 2.14 | 38.61 | 0.09 | 0.034 | 0.004 | 47.45 | 0.47 | 0.49 | 0.47 | 0.46 | 0.04 | 1.93  |
| S27 | 0.75 | 0.004 | 0.018 | 0.091 | 0.001 | 0.002 | 7.42  | 3.00 | 43.94 | 0.09 | 0.045 | 0.012 | 55.37 | 0.21 | 0.26 | 0.22 | 0.18 | 0.02 | 0.89  |
| S28 | 0.82 | 0.005 | 0.011 | 0.039 | 0.001 | 0.002 | 6.87  | 2.70 | 43.39 | 0.11 | 0.027 | 0.007 | 53.98 | 0.38 | 0.35 | 0.65 | 0.27 | 0.13 | 1.78  |
| S29 | 0.75 | 0.006 | 0.024 | 0.099 | 0.002 | 0.003 | 9.00  | 2.05 | 39.47 | 0.07 | 0.028 | 0.001 | 51.51 | 0.14 | 0.25 | 0.17 | 0.12 | 0.02 | 0.69  |
| S30 | 0.56 | 0.003 | 0.009 | 0.057 | 0.001 | 0.003 | 5.21  | 1.94 | 39.55 | 0.10 | 0.028 | 0.001 | 47.46 | 1.73 | 1.54 | 2.76 | 2.11 | 0.99 | 9.14  |
| S31 | 0.51 | 0.003 | 0.010 | 0.113 | 0.002 | 0.008 | 4.21  | 2.00 | 35.02 | 0.10 | 0.030 | 0.001 | 42.01 | 0.88 | 0.45 | 1.86 | 0.57 | 0.53 | 4.29  |
| S32 | 1.10 | 0.005 | 0.009 | 0.041 | 0.002 | 0.005 | 5.60  | 3.65 | 41.19 | 0.18 | 0.028 | 0.033 | 51.84 | 4.68 | 0.62 | 6.24 | 2.34 | 0.10 | 13.99 |

|     |      |       |       |       |       |       |      |      |       |      |       |       |       |      |      |      |      |      |       |
|-----|------|-------|-------|-------|-------|-------|------|------|-------|------|-------|-------|-------|------|------|------|------|------|-------|
| S33 | 0.98 | 0.006 | 0.014 | 0.069 | 0.002 | 0.005 | 7.43 | 3.92 | 46.63 | 0.14 | 0.030 | 0.022 | 59.25 | 1.36 | 0.64 | 2.38 | 1.00 | 0.43 | 5.80  |
| S34 | 0.41 | 0.002 | 0.001 | 0.027 | 0.001 | 0.006 | 6.43 | 2.43 | 37.66 | 0.14 | 0.034 | 0.012 | 47.14 | 1.56 | 1.14 | 2.47 | 1.13 | 0.93 | 7.22  |
| S35 | 0.58 | 0.004 | 0.006 | 0.030 | 0.001 | 0.010 | 6.82 | 2.43 | 39.56 | 0.12 | 0.030 | 0.009 | 49.60 | 0.13 | 0.23 | 0.11 | 0.20 | 0.02 | 0.69  |
| S36 | 0.92 | 0.008 | 0.010 | 0.049 | 0.002 | 0.003 | 7.47 | 3.11 | 40.26 | 0.12 | 0.031 | 0.034 | 52.03 | 0.45 | 0.48 | 0.38 | 0.45 | 0.06 | 1.83  |
| S37 | 0.91 | 0.025 | 0.018 | 0.069 | 0.002 | 0.005 | 6.05 | 3.14 | 38.00 | 0.20 | 0.028 | 0.073 | 48.51 | 0.37 | 0.37 | 0.47 | 0.26 | 0.10 | 1.57  |
| S38 | 0.53 | 0.008 | 0.030 | 0.021 | 0.001 | 0.013 | 0.70 | 1.02 | 21.12 | 0.15 | 0.028 | 0.009 | 23.64 | 1.24 | 0.71 | 2.57 | 0.96 | 0.59 | 6.07  |
| S39 | 1.17 | 0.022 | 0.034 | 0.061 | 0.003 | 0.007 | 4.95 | 2.87 | 39.93 | 0.16 | 0.033 | 0.029 | 49.26 | 3.12 | 1.98 | 5.40 | 3.73 | 0.80 | 15.04 |
| S40 | 0.89 | 0.004 | 0.008 | 0.036 | 0.002 | 0.005 | 5.07 | 2.73 | 39.74 | 0.15 | 0.029 | 0.007 | 48.67 | 2.37 | 0.57 | 4.20 | 1.51 | 0.87 | 9.52  |
| S41 | 0.81 | 0.012 | 0.028 | 0.071 | 0.003 | 0.015 | 5.38 | 1.28 | 34.16 | 0.08 | 0.028 | 0.000 | 41.87 | 1.59 | 0.53 | 2.33 | 0.94 | 0.20 | 5.59  |
| S42 | 1.00 | 0.016 | 0.037 | 0.037 | 0.002 | 0.011 | 4.59 | 2.68 | 41.40 | 0.17 | 0.028 | 0.028 | 50.00 | 1.96 | 0.89 | 4.34 | 1.99 | 0.48 | 9.65  |
| S43 | 1.15 | 0.011 | 0.008 | 0.029 | 0.002 | 0.007 | 3.59 | 2.87 | 40.66 | 0.34 | 0.029 | 0.016 | 48.71 | 2.04 | 1.74 | 4.38 | 2.58 | 0.10 | 10.84 |
| S44 | 0.53 | 0.008 | 0.020 | 0.165 | 0.002 | 0.005 | 7.06 | 2.38 | 38.17 | 0.09 | 0.030 | 0.015 | 48.48 | 0.11 | 0.23 | 0.05 | 0.10 | 0.02 | 0.50  |
| S45 | 0.39 | 0.003 | 0.005 | 0.041 | 0.001 | 0.002 | 6.59 | 1.49 | 38.42 | 0.10 | 0.030 | 0.000 | 47.07 | 0.04 | 0.13 | 0.04 | 0.10 | 0.01 | 0.32  |
| S46 | 0.62 | 0.002 | 0.001 | 0.032 | 0.001 | 0.003 | 5.33 | 2.93 | 41.66 | 0.16 | 0.028 | 0.030 | 50.81 | 0.20 | 0.39 | 0.04 | 0.10 | 0.04 | 0.77  |
| S47 | 0.54 | 0.006 | 0.011 | 0.037 | 0.002 | 0.005 | 3.66 | 2.57 | 35.76 | 0.12 | 0.031 | 0.017 | 42.76 | 0.65 | 0.50 | 1.19 | 0.53 | 0.24 | 3.11  |
| S48 | 0.55 | 0.005 | 0.009 | 0.039 | 0.005 | 0.007 | 3.86 | 2.68 | 35.76 | 0.19 | 0.035 | 0.029 | 43.17 | 1.91 | 1.30 | 2.69 | 1.81 | 0.27 | 7.97  |
| S49 | 1.06 | 0.022 | 0.025 | 0.030 | 0.004 | 0.005 | 1.56 | 2.75 | 31.18 | 0.27 | 0.040 | 0.084 | 37.03 | 4.42 | 2.03 | 6.00 | 4.03 | 0.31 | 16.78 |
| S50 | 0.37 | 0.005 | 0.017 | 0.025 | 0.002 | 0.007 | 3.06 | 1.69 | 31.22 | 0.10 | 0.032 | 0.000 | 36.53 | 2.26 | 0.69 | 4.06 | 1.88 | 0.19 | 9.08  |

|       |           |       |       |       |       |       |       |       |       |       |       |        |       |       |       |           |            |        |       |
|-------|-----------|-------|-------|-------|-------|-------|-------|-------|-------|-------|-------|--------|-------|-------|-------|-----------|------------|--------|-------|
| CV(%) | 49.1<br>0 | 78.99 | 68.18 | 55.76 | 41.48 | 65.05 | 36.12 | 28.64 | 13.63 | 49.74 | 12.96 | 122.35 | 15.62 | 99.04 | 73.88 | 94.5<br>0 | 112.<br>80 | 102.79 | 90.22 |
|-------|-----------|-------|-------|-------|-------|-------|-------|-------|-------|-------|-------|--------|-------|-------|-------|-----------|------------|--------|-------|

---

1. Danshensu; 2. Protocatechuic acid; 3. Protocatechualdehyde; 4. Caffeic acid; 5. Ferulic acid; 6. Isferulic acid; 7. Rosmarinic acid; 8. Lithospermic acid; 9. Salvianolic acid B; 10. Salvianolic acid A; 11. Cinnamic acid; 12. Salvianolic acid C; 13. Dihydrotanshinone I; 14. Tanshinone I; 15. Cryptotanshinone; 16. Tanshinone IIA ; 17. Miltirone.

**Table S2. Results of antioxidant capability in different places of *S. miltiorrhiza***

| Sample code | Regression eq       |                     | R <sup>2</sup> |        | IC <sub>50</sub> (µg/mL) |         |
|-------------|---------------------|---------------------|----------------|--------|--------------------------|---------|
|             | DPPH                | ABTS                | DPPH           | ABTS   | DPPH                     | ABTS    |
| S1          | y = 1.739x + 1.0138 | y = 2.566x + 0.8915 | 0.9997         | 0.9993 | 28.1692                  | 19.1382 |
| S2          | y = 1.819x + 1.5661 | y = 2.136x + 12.731 | 0.9994         | 0.9927 | 26.6267                  | 17.4480 |
| S3          | y = 1.588x + 2.5685 | y = 2.172x + 4.1808 | 0.9953         | 0.9955 | 29.8687                  | 21.0954 |
| S4          | y = 1.889x + 4.1088 | y = 2.715x - 4.2156 | 0.9913         | 0.991  | 24.2939                  | 19.9689 |
| S5          | y = 0.808x + 1.0621 | y = 1.248x + 1.5313 | 0.9991         | 0.9975 | 60.5667                  | 38.8371 |
| S6          | y = 1.571x + 2.253  | y = 2.124x + 0.8815 | 0.999          | 0.9967 | 30.3927                  | 23.1255 |
| S7          | y = 1.289x + 1.4497 | y = 1.587x - 1.4348 | 0.9965         | 0.9973 | 37.6651                  | 32.4101 |
| S8          | y = 2.858x + 2.7148 | y = 3.910x + 0.2379 | 0.9946         | 0.9995 | 16.5449                  | 12.7269 |
| S9          | y = 1.580x + 0.1297 | y = 2.269x + 3.2957 | 0.9973         | 0.9962 | 31.5635                  | 20.5836 |
| S10         | y = 1.908x - 0.0794 | y = 2.228x + 8.2593 | 0.9938         | 0.9965 | 26.2471                  | 18.7346 |
| S11         | y = 0.565x + 1.8479 | y = 0.832x + 2.5904 | 0.9965         | 0.9961 | 85.2250                  | 56.9827 |
| S12         | y = 2.073x + 3.0204 | y = 2.578x + 2.3079 | 0.9986         | 0.9932 | 22.6626                  | 18.4997 |
| S13         | y = 1.894x + 1.288  | y = 2.484x + 3.3326 | 0.9975         | 0.9976 | 25.7191                  | 18.7872 |
| S14         | y = 1.557x + 1.621  | y = 1.933x - 0.8819 | 0.9943         | 0.997  | 31.0719                  | 26.3228 |
| S15         | y = 2.454x + 3.0832 | y = 3.889x - 2.0765 | 0.9979         | 0.9975 | 19.1185                  | 13.3907 |
| S16         | y = 2.642x - 2.182  | y = 3.135x + 1.8245 | 0.9956         | 0.9957 | 19.7509                  | 15.3670 |
| S17         | y = 1.914x + 0.4717 | y = 2.689x + 2.1914 | 0.9976         | 0.9968 | 25.8769                  | 17.7793 |
| S18         | y = 1.394x - 0.5783 | y = 2.143x - 1.094  | 0.9997         | 0.9976 | 36.2829                  | 23.8423 |
| S19         | y = 1.878x + 1.2885 | y = 3.037x - 7.7037 | 0.999          | 0.9988 | 25.9380                  | 19.0002 |
| S20         | y = 1.518x + 1.4355 | y = 2.942x + 2.3213 | 0.9982         | 0.9966 | 31.9924                  | 23.3490 |
| S21         | y = 1.586x + 2.6846 | y = 1.994x + 3.2512 | 0.9987         | 0.9964 | 29.8332                  | 23.4447 |
| S22         | y = 2.368x + 0.5635 | y = 2.839x + 0.9522 | 0.9978         | 0.9965 | 20.8769                  | 17.2764 |
| S23         | y = 1.839x - 1.8809 | y = 2.400x - 1.7102 | 0.9962         | 0.9978 | 28.2115                  | 21.5459 |
| S24         | y = 1.634x - 1.8429 | y = 2.048x + 3.3345 | 0.9959         | 0.9975 | 31.7276                  | 22.7859 |
| S25         | y = 2.277x + 1.3545 | y = 2.972x + 0.7943 | 0.9985         | 0.9989 | 21.3639                  | 16.5564 |
| S26         | y = 1.506x + 1.3545 | y = 2.031x + 0.0105 | 0.9943         | 0.9956 | 33.8957                  | 24.6132 |

|        |                        |                        |        |        |         |         |
|--------|------------------------|------------------------|--------|--------|---------|---------|
| S27    | $y = 2.163x + 0.4673$  | $y = 2.064x + 7.8243$  | 0.9997 | 0.9934 | 22.9000 | 16.1965 |
| S28    | $y = 1.896x + 3.4849$  | $y = 2.954x + 0.3666$  | 0.9952 | 0.999  | 24.5333 | 16.8021 |
| S29    | $y = 1.900x + 2.8888$  | $y = 2.554x + 3.1689$  | 0.9955 | 0.9985 | 24.7954 | 18.3364 |
| S30    | $y = 1.489x + 1.6804$  | $y = 1.831x + 2.4852$  | 0.9977 | 0.997  | 32.4510 | 25.9502 |
| S31    | $y = 1.575x + 2.7806$  | $y = 2.012x + 3.6016$  | 0.9998 | 0.9962 | 29.9806 | 23.0608 |
| S32    | $y = 1.891x + 3.8279$  | $y = 2.344x + 5.1419$  | 0.9929 | 0.9908 | 24.4168 | 19.1374 |
| S33    | $y = 2.624x + 3.0601$  | $y = 3.236x + 2.916$   | 0.9991 | 0.9997 | 17.8887 | 14.5501 |
| S34    | $y = 1.554x + 1.6607$  | $y = 2.235x + 0.802$   | 0.9992 | 0.9996 | 31.1064 | 22.0125 |
| S35    | $y = 1.484x + 2.4322$  | $y = 1.931x + 2.8026$  | 0.9953 | 0.9937 | 32.0538 | 24.4419 |
| S36    | $y = 2.042x + 0.9879$  | $y = 2.584x + 3.7799$  | 0.9985 | 0.991  | 24.0020 | 17.8870 |
| S37    | $y = 1.807x + 0.303$   | $y = 2.548x + 4.7965$  | 0.9992 | 0.994  | 27.5025 | 17.7408 |
| S38    | $y = 0.689x + 2.7603$  | $y = 0.983x + 2.3965$  | 0.9969 | 0.9943 | 68.5627 | 48.4268 |
| S39    | $y = 1.569x + 4.6095$  | $y = 2.517x + 1.1579$  | 0.9969 | 0.9999 | 28.9296 | 19.4049 |
| S40    | $y = 1.571x - 0.9355$  | $y = 1.893x + 2.9754$  | 0.9922 | 0.9952 | 32.4223 | 24.8413 |
| S41    | $y = 1.581x - 1.8948$  | $y = 1.992x + 0.7091$  | 0.9979 | 0.9991 | 32.8240 | 24.7444 |
| S42    | $y = 1.930x + 0.4095$  | $y = 2.532x - 2.3259$  | 0.998  | 0.9951 | 25.6946 | 20.6658 |
| S43    | $y = 1.459x + 1.6408$  | $y = 2.247x - 1.0428$  | 0.9975 | 0.9959 | 33.1454 | 22.7160 |
| S44    | $y = 1.500x + 1.932$   | $y = 1.912x + 3.0423$  | 0.993  | 0.9957 | 32.0453 | 24.5595 |
| S45    | $y = 1.366x + 2.1022$  | $y = 2.009x - 0.7853$  | 0.9953 | 0.9984 | 35.0643 | 25.2789 |
| S46    | $y = 1.843x + 2.3915$  | $y = 2.512x + 2.5477$  | 0.9978 | 0.997  | 25.8321 | 18.8902 |
| S47    | $y = 1.164x + 2.2764$  | $y = 1.590x + 4.2234$  | 0.9981 | 0.9922 | 40.9997 | 28.7903 |
| S48    | $y = 1.083x + 1.0093$  | $y = 1.363x + 2.3316$  | 0.9998 | 0.9936 | 45.2361 | 34.9731 |
| S49    | $y = 0.931x + 2.5459$  | $y = 1.595x + 0.2166$  | 0.9946 | 0.9988 | 50.9711 | 31.2122 |
| S50    | $y = 0.754x - 0.5189$  | $y = 1.121x - 0.9335$  | 0.998  | 0.9953 | 67.0012 | 45.4358 |
| Trolox | $y = 10.625x - 0.7075$ | $y = 16.129x - 1.1556$ | 0.9974 | 0.9991 | 4.7725  | 3.1717  |
| mean   |                        |                        |        |        | 32.2369 | 23.3933 |

---

**Table S3. *S. miltiorrhiza* populations included in this study, their collection sites, habitat and geographical coordinates.**

| Sample code | Place of origin or Geographic region | Latitude(°N) | Longitude(°E) | Altitude (m) | Habitat        |
|-------------|--------------------------------------|--------------|---------------|--------------|----------------|
| S1          | Hanzhong, Shaanxi                    | 33.75598     | 106.33001     | 517          | Pine forest    |
| S2          | Guilin, Guangxi                      | 25.285235    | 110.275236    | 154          | Roadside       |
| S3          | Guilin, Guangxi                      | 25.285825    | 110.276488    | 158          | Park           |
| S4          | Shangluo, Shaanxi                    | 33.271065    | 110.354161    | 462          | Hillside       |
| S5          | Lingbao, Henan                       | 34.195045    | 110.430931    | 703          | Roadside       |
| S6          | Shiyan, Hubei                        | 32.016233    | 110.566046    | 715          | Field          |
| S7          | Shiyan, Hubei                        | 32.016797    | 110.566581    | 689          | Hillside       |
| S8          | Shiyan, Hubei                        | 32.03189     | 110.568964    | 544          | Mountain roads |
| S9          | Zhangjiajie, Hunan                   | 29.240994    | 110.724758    | 159          | Hillside       |
| S10         | Zhangjiajie, Hunan                   | 29.240094    | 110.724758    | 149          | Hillside       |
| S11         | Nanyang, Henan                       | 33.274778    | 111.533463    | 608          | Grass          |
| S12         | Yuncheng, Shanxi                     | 35.279606    | 111.884369    | 537          | Hillside       |
| S13         | Changzhi, Shanxi                     | 36.64011     | 112.318259    | 1217         | Valley         |
| S14         | Hengyang, Hunan                      | 27.281111    | 112.729685    | 390          | Hill           |
| S15         | Hengyang, Hunan                      | 27.281857    | 112.730637    | 353          | Hill           |
| S16         | Jiaozuo, Henan                       | 35.337025    | 113.252312    | 382          | Grass          |
| S17         | Yangquan, Shanxi                     | 38.205892    | 113.59612     | 1169         | Field          |



|     |                     |           |            |     |                      |
|-----|---------------------|-----------|------------|-----|----------------------|
| S18 | Tongcheng,<br>Hubei | 29.316633 | 113.670079 | 132 | Behind a<br>house    |
| S19 | Anyang, Henan       | 36.162731 | 113.718918 | 668 | Roadside             |
| S20 | Anyang, Henan       | 36.163708 | 113.719491 | 670 | Roadside             |
| S21 | Xingtai, Hebei      | 37.156893 | 113.94061  | 533 | Chestnut<br>forest   |
| S22 | Xingtai, Hebei      | 37.157747 | 113.943564 | 553 | Woods                |
| S23 | Xingtai, Hebei      | 37.159808 | 113.943781 | 496 | Side of a<br>village |
| S24 | Xinyang, Henan      | 31.502254 | 114.01514  | 238 | Roadside             |
| S25 | Ji'an, Jiangxi      | 26.312302 | 114.114013 | 418 | Woods                |
| S26 | Ji'an, Jiangxi      | 26.311784 | 114.114088 | 407 | Grass                |
| S27 | Ji'an, Jiangxi      | 26.31209  | 114.11409  | 415 | Grass                |
| S28 | Ji'an, Jiangxi      | 26.312522 | 114.114259 | 429 | Brookside            |
| S29 | Ganzhou,<br>Jiangxi | 25.382957 | 114.180527 | 816 | Bamboo<br>forest     |
| S30 | Wuhan, Hubei        | 30.553826 | 114.414365 | 20  | Park                 |
| S31 | Baoding, Hebei      | 39.271298 | 115.305802 | 143 | Hill                 |
| S32 | Baoding, Hebei      | 39.269757 | 115.307681 | 152 | Roadside             |
| S33 | Baoding, Hebei      | 39.268056 | 115.308162 | 148 | Roadside             |
| S34 | Huanggang,<br>Hubei | 30.78971  | 115.367631 | 94  | Hill                 |
| S35 | Jiujiang, Jiangxi   | 29.538842 | 116.031751 | 354 | Woods                |
| S36 | Jiujiang, Jiangxi   | 29.538866 | 116.031758 | 362 | Temple<br>nearby     |
| S37 | Nanfeng, Jiangxi    | 27.035884 | 116.230774 | 165 | Valley               |
| S38 | Jinan, Shandong     | 36.32271  | 117.152962 | 452 | Grass                |
| S39 | Linyi, Shandong     | 35.145267 | 117.331005 | 352 | Hill                 |
| S40 | Tangshan, Hebei     | 40.207318 | 117.665181 | 142 | Pine forest          |
| S41 | Laiwu,<br>Shandong  | 36.353555 | 117.813792 | 353 | Hill                 |

|     |                       |           |            |     |              |
|-----|-----------------------|-----------|------------|-----|--------------|
| S42 | Laiwu,<br>Shandong    | 36.353827 | 117.813812 | 317 | Field        |
| S43 | Laiwu,<br>Shandong    | 36.351476 | 117.818788 | 387 | Woods        |
| S44 | Xuancheng,<br>Anhui   | 30.602898 | 118.696055 | 278 | Roadside     |
| S45 | Hangzhou,<br>Zhejiang | 29.791199 | 118.97704  | 480 | Hillside     |
| S46 | Linan, Zhejiang       | 29.361699 | 119.022079 | 350 | Roadside     |
| S47 | Qinhuangdao,<br>Hebei | 39.817158 | 119.450445 | 90  | Roadside     |
| S48 | Qinhuangdao,<br>Hebei | 39.819352 | 119.451303 | 65  | Bushes       |
| S49 | Qingdao,<br>Shandong  | 36.160122 | 120.302143 | 187 | Pine trees   |
| S50 | Dalian, Liaoning      | 38.922769 | 121.502179 | 75  | Highway side |

---

Table S4. Intercorrelations between effective compounds of *S. miltiorrhiza*.

|                      | Tanshinone I | Dihydrotanshinone I | Miltirone | Tanshinone IIA | Cryptotanshinone | Total tanshinones | Protocatechualdehyde | Cinnamic acid | Protocatechuic acid | Caffeic acid | Ferulic acid | Isferulic acid | Danshensu | Rosmarinic acid | Salvianolic acid C | Salvianolic acid A | Lithospermic acid | Salvianolic acid B | Total phenolics |
|----------------------|--------------|---------------------|-----------|----------------|------------------|-------------------|----------------------|---------------|---------------------|--------------|--------------|----------------|-----------|-----------------|--------------------|--------------------|-------------------|--------------------|-----------------|
| Tanshinone I         | 1            |                     |           |                |                  |                   |                      |               |                     |              |              |                |           |                 |                    |                    |                   |                    |                 |
| Dihydrotanshinone I  | 0.635**      | 1                   |           |                |                  |                   |                      |               |                     |              |              |                |           |                 |                    |                    |                   |                    |                 |
| Miltirone            | 0.449**      | 0.449**             | 1         |                |                  |                   |                      |               |                     |              |              |                |           |                 |                    |                    |                   |                    |                 |
| Tanshinone IIA       | 0.732**      | 0.913**             | 0.530**   | 1              |                  |                   |                      |               |                     |              |              |                |           |                 |                    |                    |                   |                    |                 |
| Cryptotanshinone     | 0.634**      | 0.938**             | 0.620**   | 0.897**        | 1                |                   |                      |               |                     |              |              |                |           |                 |                    |                    |                   |                    |                 |
| Total tanshinones    | 0.738**      | 0.965**             | 0.614**   | 0.962**        | 0.974**          | 1                 |                      |               |                     |              |              |                |           |                 |                    |                    |                   |                    |                 |
| Protocatechualdehyde | 0.286        | 0.297               | 0.134     | 0.314*         | 0.226            | 0.303             | 1                    |               |                     |              |              |                |           |                 |                    |                    |                   |                    |                 |
| Cinnamic acid        | 0.308        | 0.139               | 0.064     | 0.138          | 0.062            | 0.134             | 0.317*               | 1             |                     |              |              |                |           |                 |                    |                    |                   |                    |                 |
| Protocatechuic acid  | 0.343*       | 0.326*              | 0.119     | 0.354*         | 0.315*           | 0.345*            | 0.652**              | 0.284         | 1                   |              |              |                |           |                 |                    |                    |                   |                    |                 |
| Caffeic acid         | -0.327*      | -0.370*             | -0.201    | -0.310*        | -0.378*          | -0.372*           | 0.239                | 0.042         | 0.027               | 1            |              |                |           |                 |                    |                    |                   |                    |                 |
| Ferulic acid         | 0.256        | 0.249               | 0.043     | 0.252          | 0.219            | 0.247             | 0.305                | 0.255         | 0.412**             | 0.006        | 1            |                |           |                 |                    |                    |                   |                    |                 |
| Isferulic acid       | 0.243        | 0.142               | 0.128     | 0.179          | 0.185            | 0.189             | 0.428**              | 0.206         | 0.343**             | 0.134        | 0.162        | 1              |           |                 |                    |                    |                   |                    |                 |
| Danshensu            | 0.124        | 0.092               | 0.091     | 0.139          | 0.181            | 0.149             | 0.375*               | 0.203         | 0.700**             | -0.011       | 0.199        | 0.316*         | 1         |                 |                    |                    |                   |                    |                 |

---

|                        |          |          |        |          |          |          |        |        |          |         |        |        |         |          |         |         |         |         |   |
|------------------------|----------|----------|--------|----------|----------|----------|--------|--------|----------|---------|--------|--------|---------|----------|---------|---------|---------|---------|---|
| Rosmarinic acid        | -0.537** | -0.520** | -0.216 | -0.432** | -0.465** | -0.501** | -0.139 | -0.29  | -0.438** | 0.438** | -0.296 | -0.087 | -0.152  | 1        |         |         |         |         |   |
| Salvianolic acid C     | 0.107    | 0.013    | -0.03  | 0.048    | 0.026    | 0.036    | 0.235  | 0.259  | 0.691**  | 0.020   | 0.245  | 0.189  | 0.691** | -0.232   | 1       |         |         |         |   |
| Salvianolic acid A     | 0.360*   | 0.261    | 0.16   | 0.334*   | 0.343*   | 0.337*   | 0.256  | 0.262  | 0.719**  | -0.211  | 0.251  | 0.348* | 0.832** | -0.445** | 0.677** | 1       |         |         |   |
| Lithospermic acid      | -0.088   | -0.053   | -0.033 | 0.012    | 0.031    | -0.01    | -0.178 | 0.034  | 0.213    | 0.006   | 0.045  | 0.045  | 0.619** | 0.22     | 0.615** | 0.473** | 1       |         |   |
| Salvianolic acid B     | -0.331*  | -0.309*  | -0.016 | -0.167   | -0.168   | -0.227   | -0.181 | -0.172 | -0.177   | 0.235   | -0.194 | -0.01  | 0.316*  | 0.700**  | 0.008   | 0.082   | 0.580** | 1       |   |
| <b>Total phenolics</b> | -0.383*  | -0.363*  | -0.07  | -0.227   | -0.233   | -0.291   | -0.155 | -0.181 | -0.17    | 0.292   | -0.199 | -0.01  | 0.318*  | 0.786**  | 0.062   | 0.046   | 0.622** | 0.983** | 1 |

---

\* shows significance at the level as  $p=0.05$ ; \*\* shows significance at the level as  $p=0.01$
